# Supplementary material for: Guanidyl-implanted UiO-66 as an efficient catalyst for the enhanced conversion of carbon dioxide into cyclic carbonates
Source: Royal Society of Chemistry journal article supplement (doi:10.1039/d1dt04110j), 2022-01-01
Supplement: d1dt04110j1.pdf [file d1dt04110j1.pdf]

## Supplementary Information

### **Guanidyl-implanted UiO-66 as efficient catalysts for enhanced conversion of carbon dioxide into cyclic carbonates**

Aijia Gao,<sup>a</sup> Fangfang Li,<sup>a</sup> Zhi Xu,<sup>a</sup> Changchun Ji,<sup>a</sup> Jing Gu,<sup>\*b</sup> and Ying-Hua Zhou<sup>\*a</sup>

<sup>a</sup> The Key Laboratory of Functional Molecular Solids, Ministry of Education, Anhui Laboratory of Molecule-Based Materials, College of Chemistry and Materials Science, Anhui Normal University, Wuhu, Anhui 241002, China

<sup>b</sup> Department of Chemistry and Biochemistry, San Diego State University, San Diego State University

E-mail: yhzhou@ahnu.edu.cn; jgu@sdsu.edu

**Table S1** Comparison of the catalytic performance of UiO-66-Gua<sub>0.2</sub>(*s*) with previously reported MOFs.

| Entry | Catalyst                               | Epoxide | Cocatalyst (mol%) | Time (h) | T (°C) | P (MPa) | Yield | Ref.      |
|-------|----------------------------------------|---------|-------------------|----------|--------|---------|-------|-----------|
| 1     | USTC-253-TFA                           | PO      | 6.5               | 72       | 25     | 0.1     | 38.2% | 1         |
| 2     | PS/UiO-66 fiber                        | ECH     | 1.55              | 4        | 120    | 2       | 78%   | 2         |
| 3     | PVA/UiO-66 fiber                       | ECH     | 1.55              | 4        | 120    | 2       | 71%   | 2         |
| 4     | MOF-5-NH <sub>2</sub>                  | ECH     | 0.5               | 6        | 50     | 1.2     | 81%   | 3         |
| 5     | UiO-66/Cu-BTC                          | PO      | 0.5               | 6        | 60     | 1.2     | 88%   | 4         |
| 6     | UMCM-1-NH <sub>2</sub>                 | PO      | 0.44              | 24       | RT     | 1.2     | 90%   | 5         |
| 7     | PNU-25-NH <sub>2</sub>                 | PO      | 0.5               | 18       | 55     | 0.1     | 93%   | 6         |
| 8     | UiO-66-Gua <sub>0.2</sub> ( <i>s</i> ) | ECH     | 0.8               | 12       | 70     | 0.1     | 84%   | This work |
| 9     | UiO-66-Gua <sub>0.2</sub> ( <i>s</i> ) | PO      | 0.8               | 12       | 70     | 0.1     | 96%   | This work |

Note : PO = propylene oxide; ECH = epichlorohydrin.

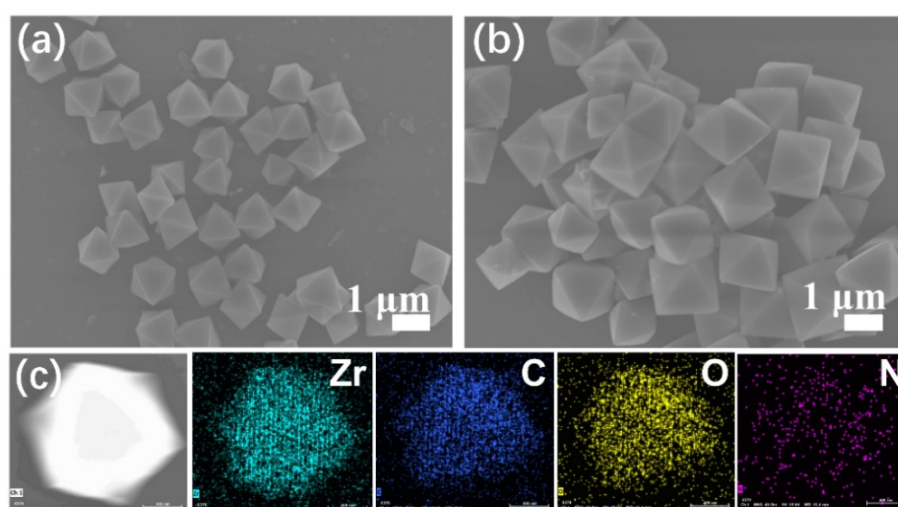

**Fig. S1** SEM images of (a) UiO-66(*l*) and (b) UiO-66-Gua<sub>0.2</sub>(*l*). (c) SEM image of UiO-66-Gua<sub>0.2</sub>(*l*) particle slice and corresponding elemental mapping of Zr, C, O, and N, respectively.

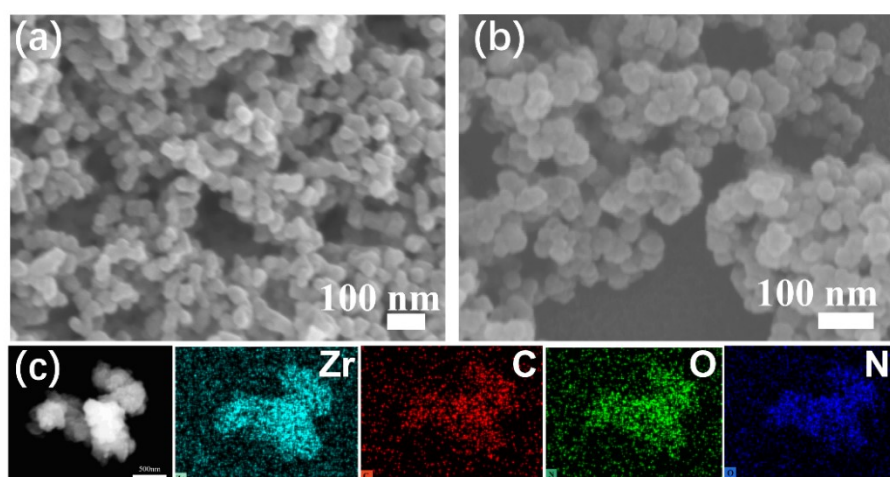

**Fig. S2** SEM images of (a) UiO-66(*s*) and (b) UiO-66-Gua<sub>0.2</sub>(*s*). (c) SEM image of UiO-66-Gua<sub>0.2</sub>(*s*) particle slice and corresponding elemental mapping of Zr, C, O, and N, respectively.

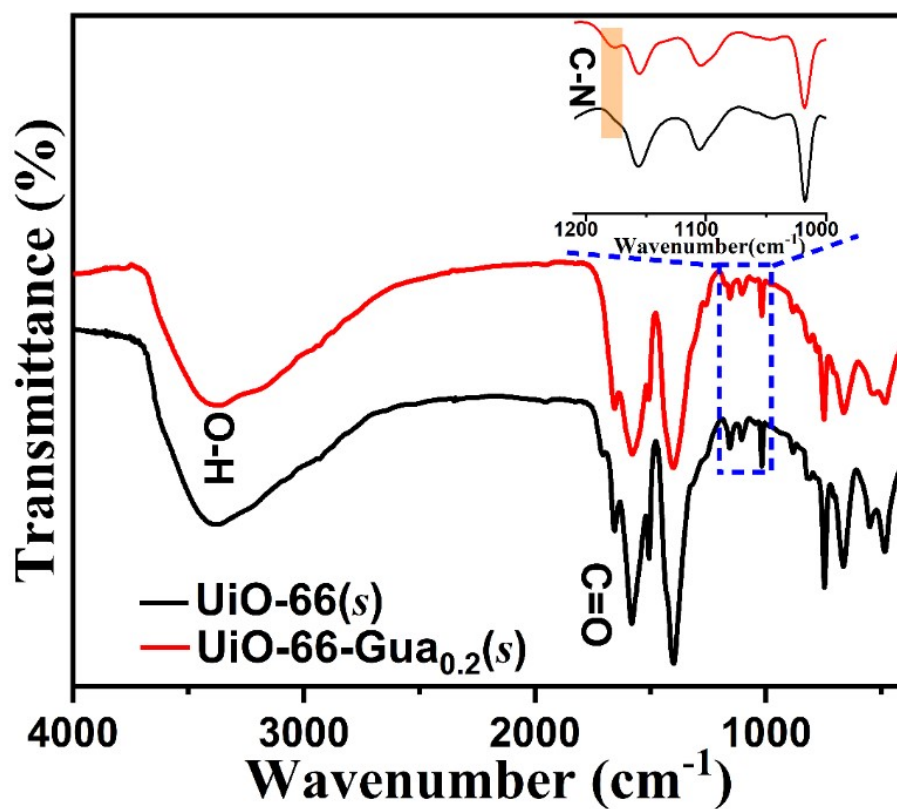

Fig. S3 FT-IR spectra of UiO-66(s) and UiO-66-Gua<sub>0.2</sub>(s).

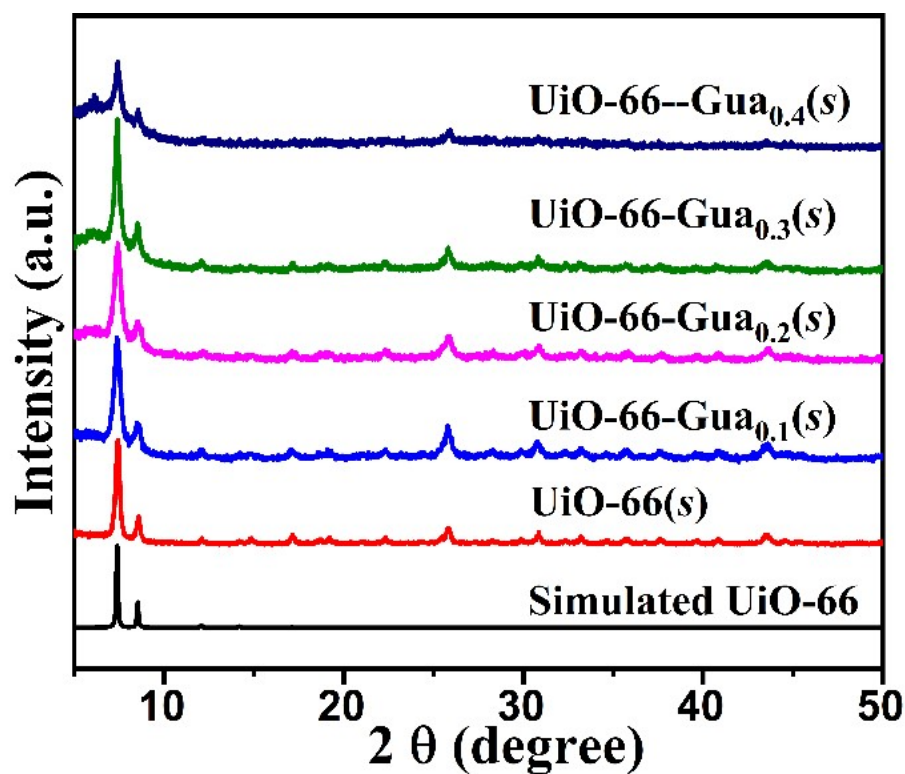

Fig. S4 PXRD patterns of UiO-66-Gua<sub>x</sub>(s) with different amount of 4-guanidinobenzoic acid hydrochloride (Gua).

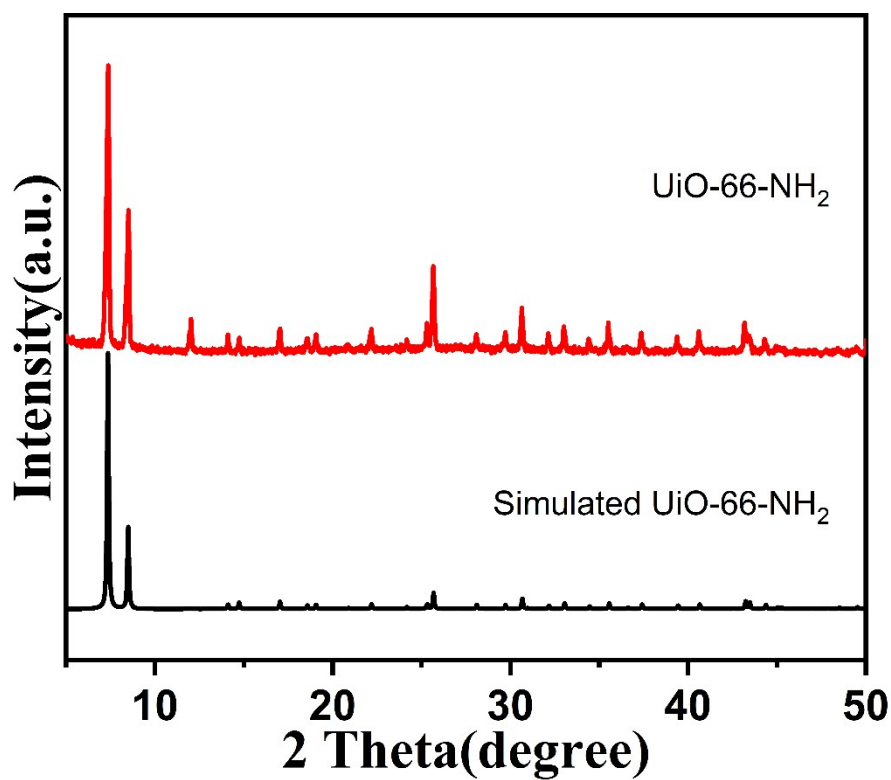

Fig. S5 PXRD pattern of UiO-66-NH<sub>2</sub>.

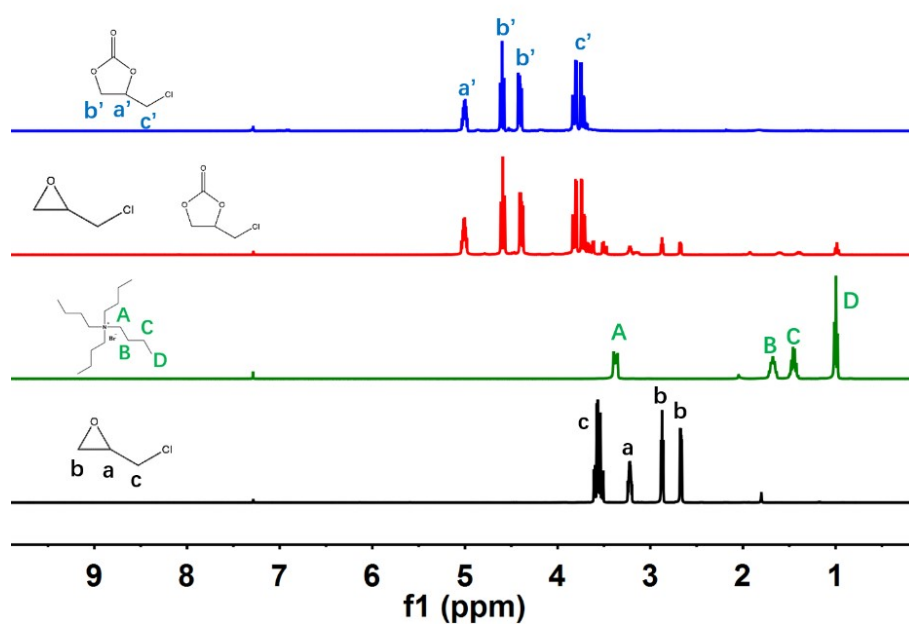

Fig. S6 <sup>1</sup>H-NMR spectra (CDCl<sub>3</sub>) for CO<sub>2</sub> cycloaddition with epichlorohydrin using UiO-66-Gua<sub>0.2</sub>(s) catalyst. Black line: the substrate; Green line: TBAB; Red line: the reaction solution after centrifugation (conditions: 10 mg catalyst, 0.8 mol% TBAB, 1.0 atm CO<sub>2</sub> and 70 °C for 12 h); Blue line: the isolated product.

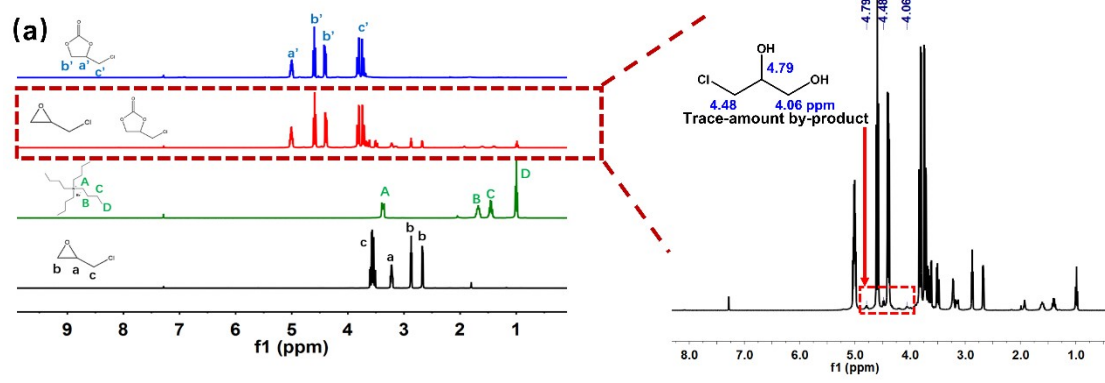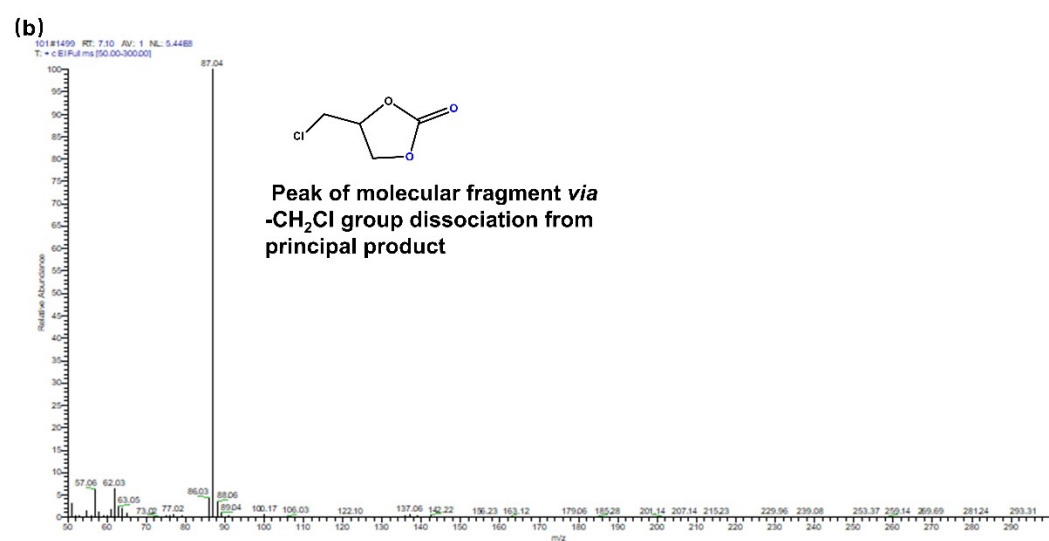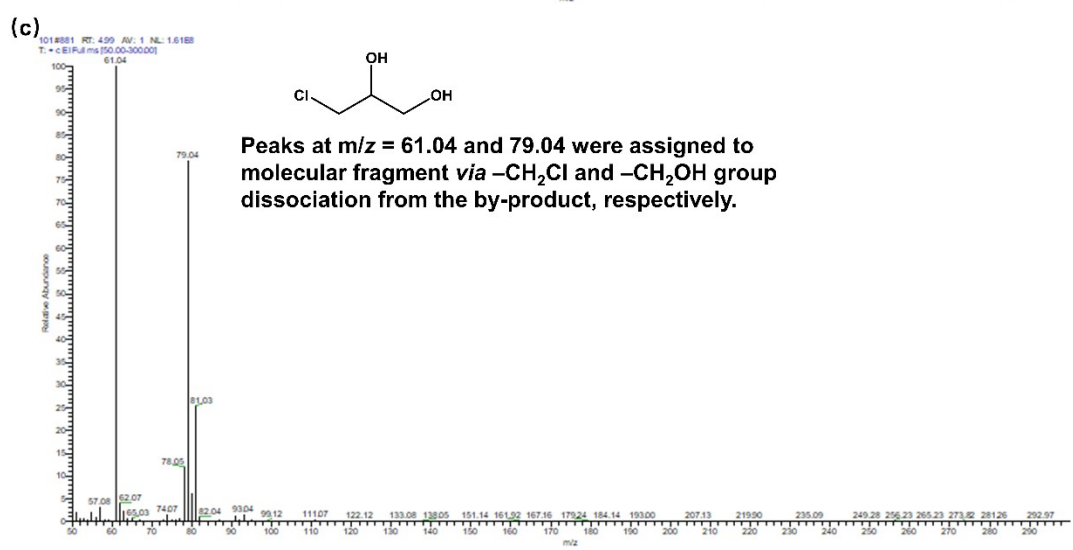

**Fig. S7** (a) <sup>1</sup>H-NMR (a) spectra (CDCl<sub>3</sub>) for CO<sub>2</sub> cycloaddition with epichlorohydrin using UiO-66-Gua<sub>0.2</sub>(s) catalyst (conditions: 10 mg catalyst, 0.8 mol% TBAB, 1.0 atm CO<sub>2</sub> and 70 °C for 12 h); (b) mass spectra of the principal product; (c) mass spectra of the by-product.

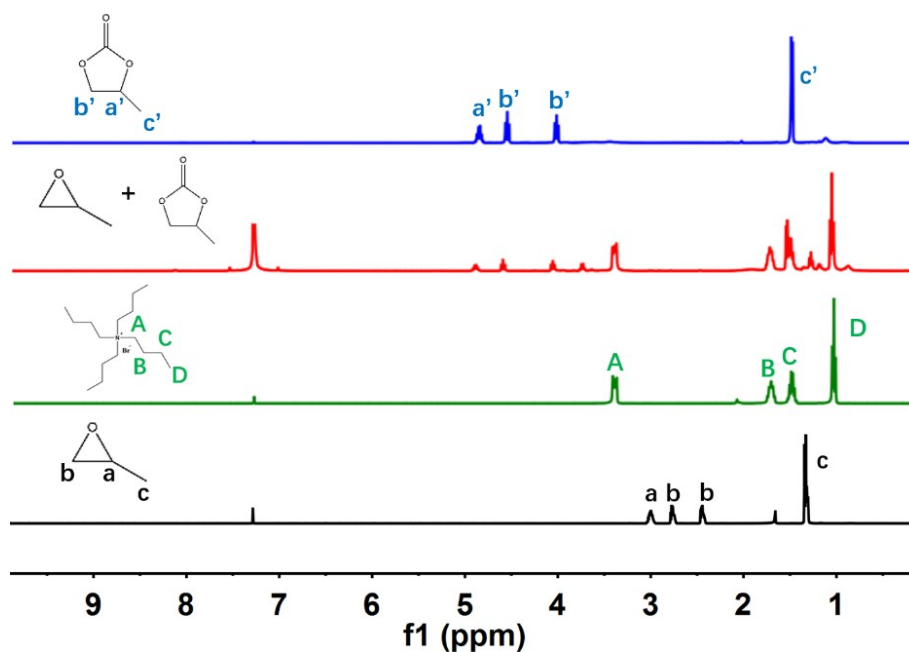

**Fig. S8**  $^1\text{H-NMR}$  spectra ( $\text{CDCl}_3$ ) for  $\text{CO}_2$  cycloaddition with propylene oxide using UiO-66-Gua $_{0.2}(s)$  catalyst. Black line: the substrate; Green line: TBAB; Red line: the reaction solution after centrifugation (conditions: 10 mg catalyst, 0.8 mol% TBAB, 1.0 atm  $\text{CO}_2$  and 70  $^\circ\text{C}$  for 12 h); Blue line: the isolated product.

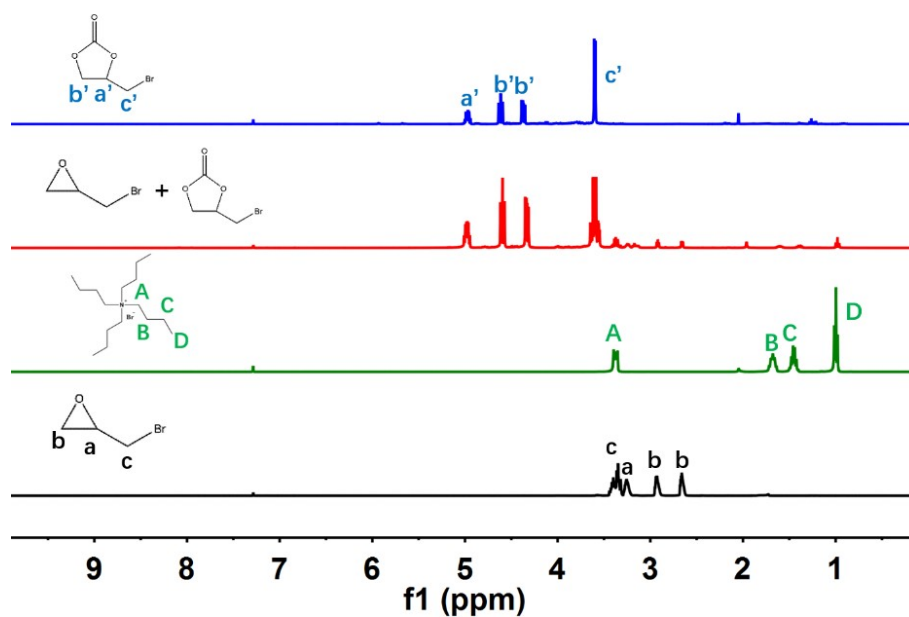

**Fig. S9**  $^1\text{H-NMR}$  spectra ( $\text{CDCl}_3$ ) for  $\text{CO}_2$  cycloaddition with epibromohydrin using UiO-66-Gua $_{0.2}(s)$  catalyst. Black line: the substrate; Green line: TBAB; Red line: the reaction solution after centrifugation (conditions: 10 mg catalyst, 0.8 mol% TBAB, 1.0 atm  $\text{CO}_2$  and 70  $^\circ\text{C}$  for 12 h); Blue line: the isolated product.

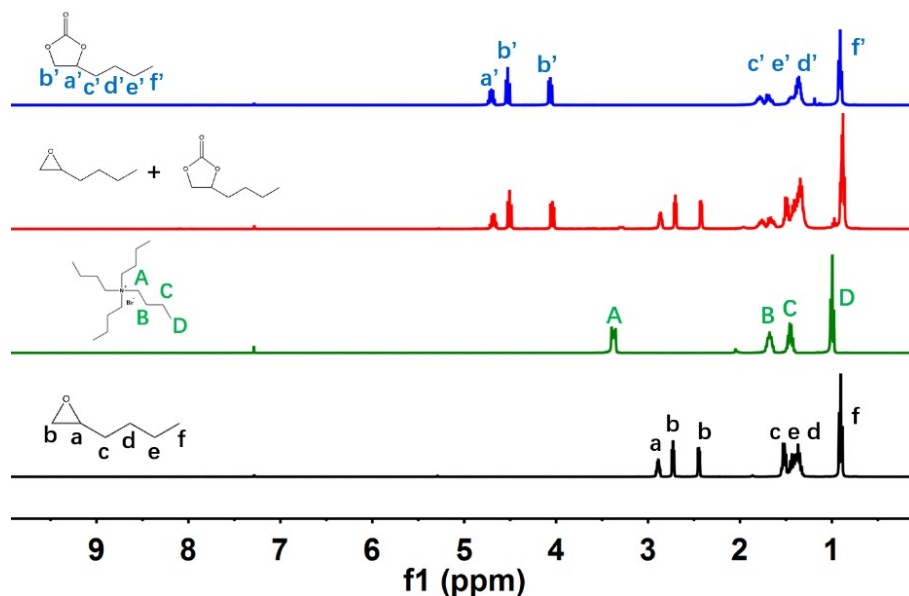

**Fig. S10**  $^1\text{H-NMR}$  spectra ( $\text{CDCl}_3$ ) for  $\text{CO}_2$  cycloaddition with 1,2-epoxyhexane using  $\text{UiO-66-Gua}_{0.2(s)}$  catalyst. Black line: the substrate; Green line: TBAB; Red line: the reaction solution after centrifugation (conditions: 10 mg catalyst, 0.8 mol% TBAB, 1.0 atm  $\text{CO}_2$  and  $70^\circ\text{C}$  for 12 h); Blue line: the isolated product.

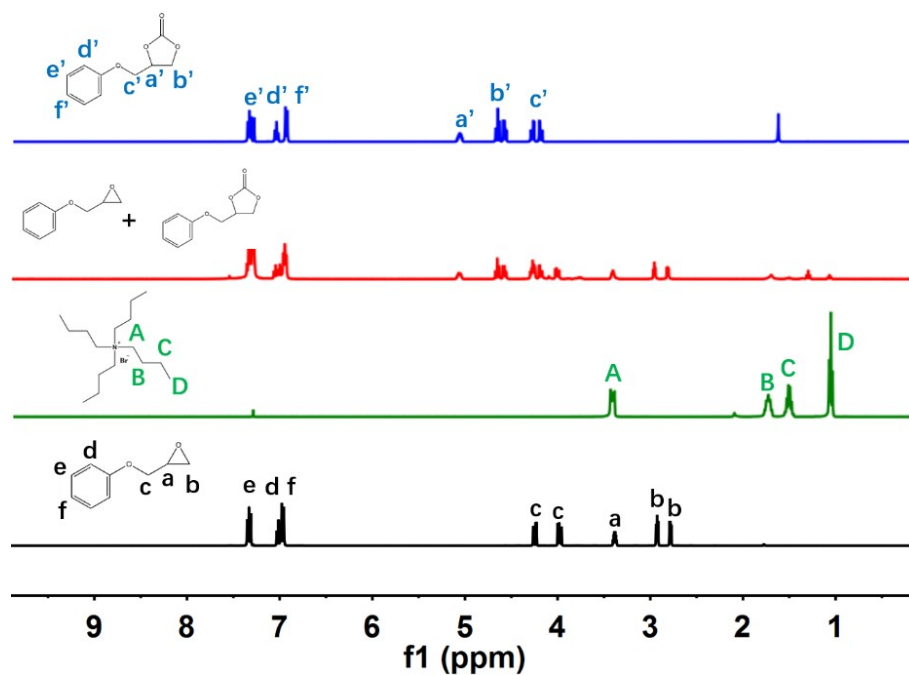

**Fig. S11**  $^1\text{H-NMR}$  spectra ( $\text{CDCl}_3$ ) for  $\text{CO}_2$  cycloaddition with epoxypropyl phenyl ether using  $\text{UiO-66-Gua}_{0.2(s)}$  catalyst. Black line: the substrate; Green line: TBAB; Red line: the reaction solution after centrifugation (conditions: 10 mg catalyst, 0.8 mol% TBAB, 1.0 atm  $\text{CO}_2$  and  $70^\circ\text{C}$  for 12 h); Blue line: the isolated product.

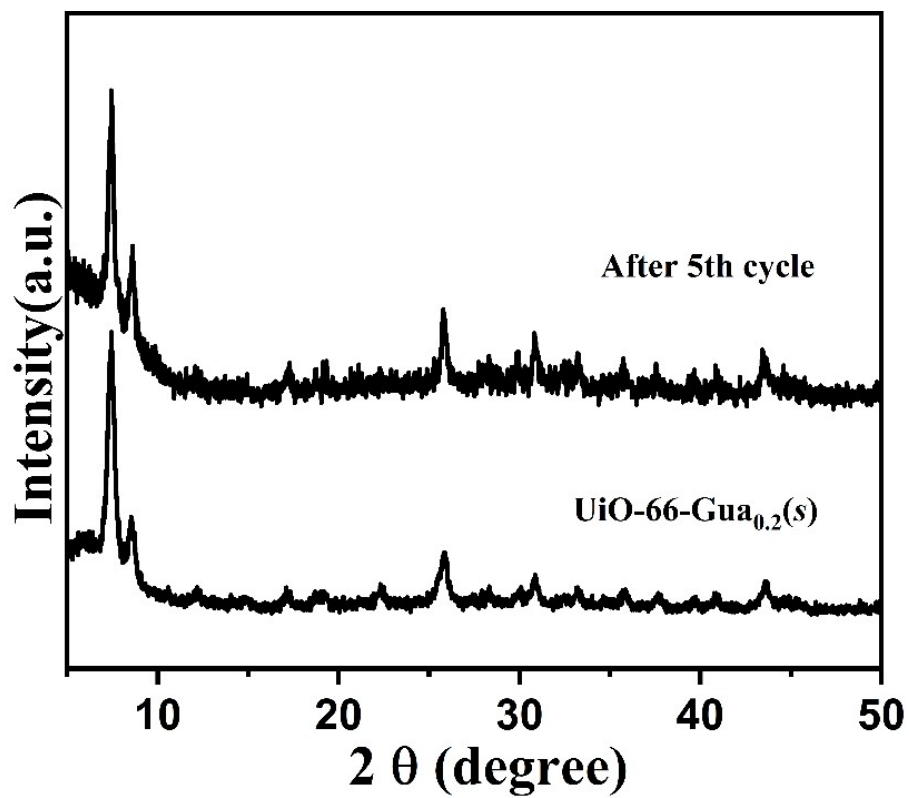

Fig. S12 PXRD patterns of UiO-66-Gua<sub>0.2</sub>(s) before and after five catalytic cycles.

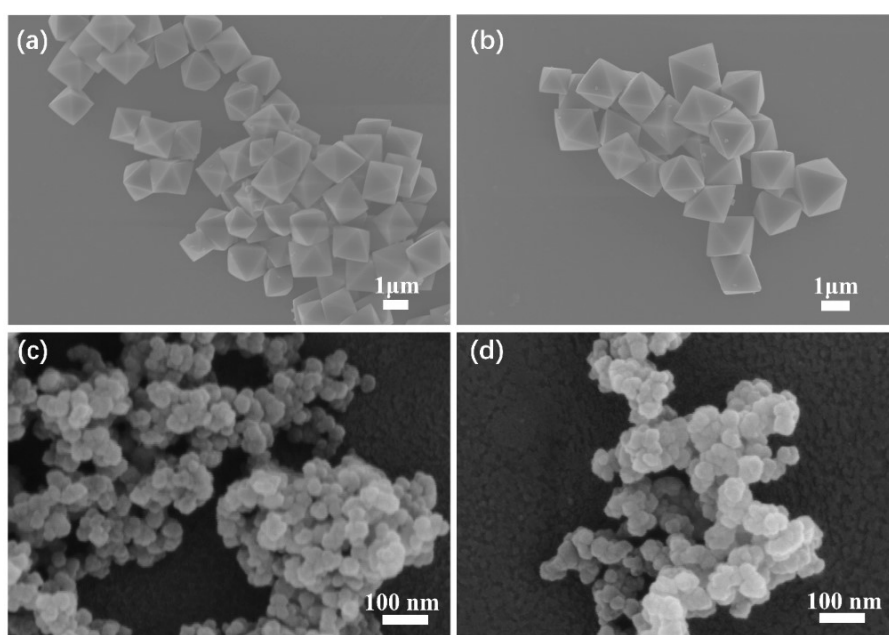

Fig. S13 SEM images of (a) as-synthesized UiO-66-Gua<sub>0.2</sub>(l), (b) UiO-66-Gua<sub>0.2</sub>(l) after catalytic cycles, (c) as-synthesized UiO-66-Gua<sub>0.2</sub>(s), and (d) UiO-66-Gua<sub>0.2</sub>(s) after catalytic cycles.



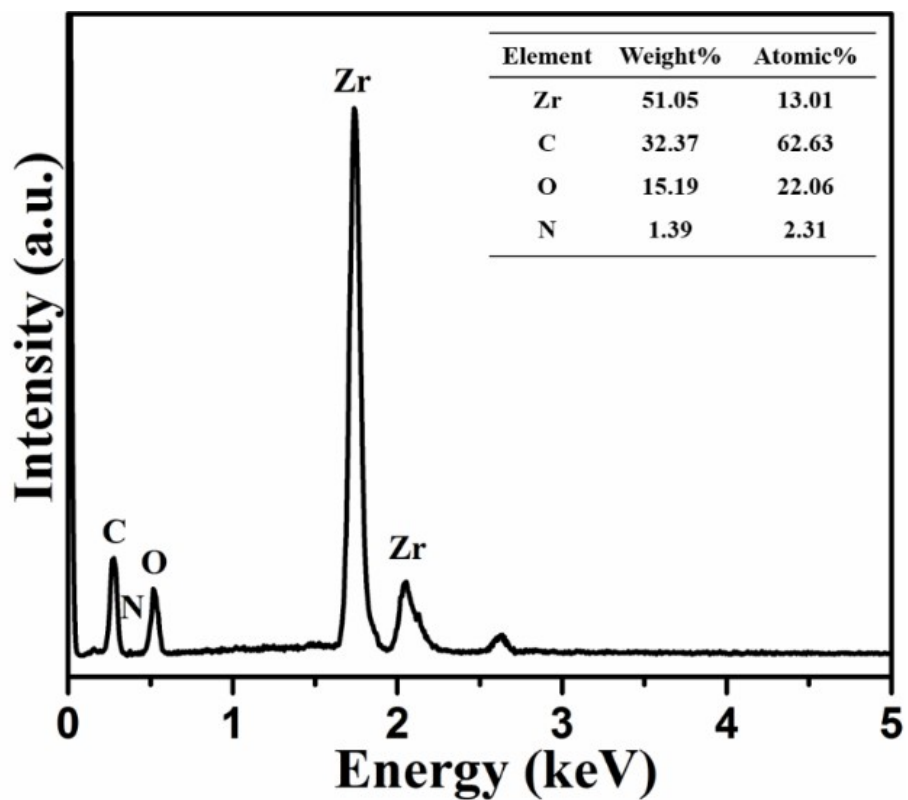

Fig. S14 EDS pattern of UiO-66-Gua<sub>0.2</sub>(s) after catalysis.

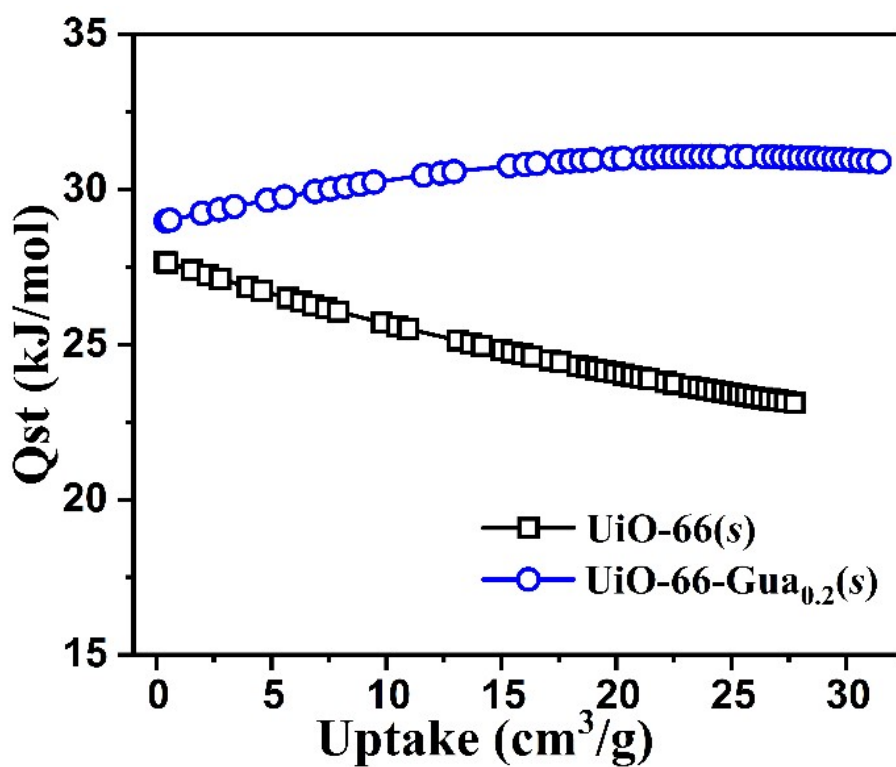

Fig. S15 CO<sub>2</sub> adsorption heat (Qst) for UiO-66(s) and UiO-66-Gua<sub>0.2</sub>(s).

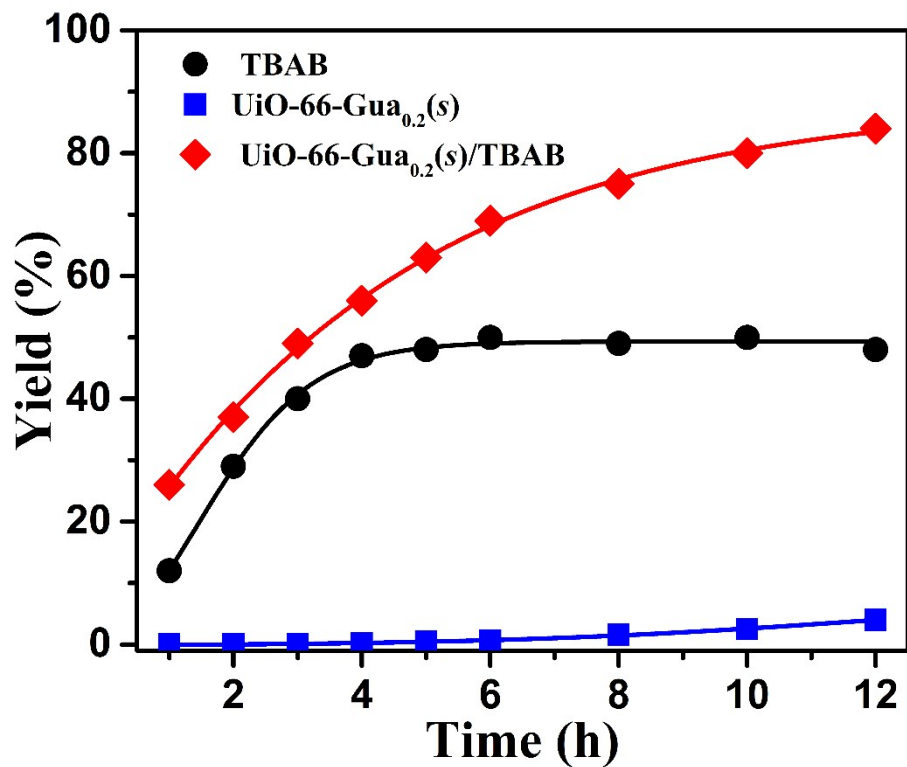

Fig. S16 The plot of the yield versus time in the presence of UiO-66-Gua<sub>0.2</sub>(s), TBAB and UiO-66-Gua<sub>0.2</sub>(s)/TBAB.

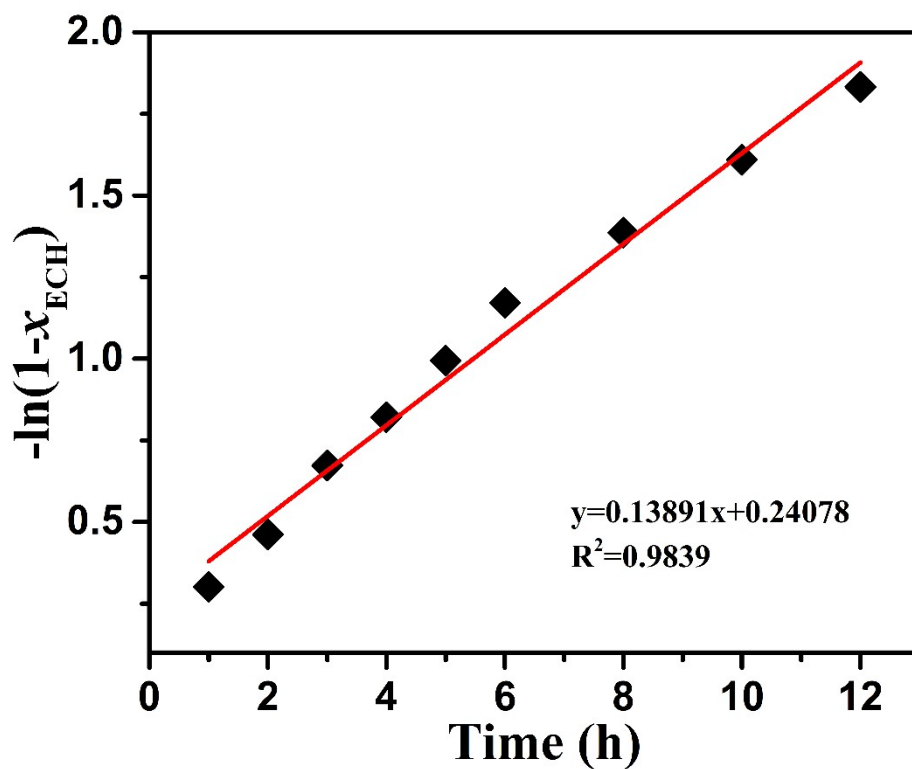

Fig. S17 First-order kinetic plot of the  $-\ln(1-x_{ECH})$  versus time in the presence of UiO-66-Gua<sub>0.2</sub>(s)/TBAB.

The reaction kinetic of CO<sub>2</sub> cycloaddition to epichlorohydrin (ECH) was studied by using a reported approach. The following rate Eq. S1 is used in calculating the kinetics of this reaction:

$$rate = -d[ECH]/dt = k (ECH)^a (CO_2)^b (catalyst)^c (cocatalyst)^d \quad (S1)$$

Here the  $k$  is the rate constant.

Since the amount of CO<sub>2</sub> is in excess hence its pressure could be considered as constant, moreover the amount of catalyst (10 mg) and cocatalyst (0.8 mol%) could be considered constant as their concentrations are not changing throughout the reaction. So the above Eq. S1 could be reduced to following Eq. S2

$$rate = -d[ECH]/dt = k_{obs} (ECH)^a \quad (S2)$$

Where  $k_{obs} = k (CO_2)^b (catalyst)^c (cocatalyst)^d$ ,

$$(ECH) = (ECH)_0 \times (1 - x_{ECH})$$

$k_{obs}$  was the observed *quasi*-first-order rate constant for ECH concentration. And  $x_{ECH}$  was the conversion percentage of ECH. From Eq. S2 it was clear that the rate of reaction depends only on the concentration of ECH hence the reaction kinetic is determined only with respect to the substrate of ECH. Eq. S2 was converted to Eq. S3 by the integral as following.

$$-\ln(1 - x_{ECH}) = k_{obs} \cdot t \quad (S3)$$

From the curve of  $-\ln(1 - x_{ECH})$  vs time were linearly fitted by the Eq. S3, the  $k_{obs}$  value for the *quasi*-first-order reaction was found to be 0.14 h<sup>-1</sup>.

## References:

- S1** Z. R. Jiang, H. Wang, Y. Hu, J. Lu and H. L. Jiang, *ChemSusChem*, 2015, **8**, 878-885.
- S2** R. Mirzaei, M. Bahadori, R. Kardanpour, S. Rafiei, S. Tangestaninejad, M. Moghadam, V. Mirkhani, I. Mohammadpoor-Baltork and S. E. Mirazimi, *Dalton Trans*, 2021, **50**, 10567-10579.
- S3** J. F. Kurisingal, Y. Rachuri, Y. Gu, Y. Choe and D.-W. Park, *Chemical Engineering Journal*, 2020, **386**, 121700.
- S4** J. F. Kurisingal, Y. Rachuri, Y. Gu, G.-H. Kim and D.-W. Park, *Applied Catalysis A: General*, 2019, **571**, 1-11.
- S5** R. Babu, A. C. Kathalikkattil, R. Roshan, J. Tharun, D.-W. Kim and D.-W. Park, *Green Chemistry*, 2016, **18**, 232-242.
- S6** J. F. Kurisingal, Y. Rachuri, Y. Gu, R. K. Chitumalla, S. Vuppala, J. Jang, K. K. Bisht, E. Suresh and D.-W. Park, *ACS Sustainable Chemistry & Engineering*, 2020, **8**, 10822-10832.
